# Supplementary material for: Plant plasma membrane-bound staphylococcal-like DNases as a novel class of eukaryotic nucleases
Source: PubMed Central journal article supplement (PMC3505149; doi:10.1186/1471-2229-12-195), 2012-10-26
Supplement: 1471-2229-12-195-S1.pdf [file 1471-2229-12-195-S1.pdf]

**Additional file 1. Microarray experiments extracted from the Genevestigator website, examining *Arabidopsis thaliana* developmental gene expression.** Experiment ID marked with an asterisk (\*) refers to those experiments showing a positive correlation between CAN1 gene expression and the developmental stages described in the text.

| Experiment ID               | Title                                                                                                                                          | Authors                              |
|-----------------------------|------------------------------------------------------------------------------------------------------------------------------------------------|--------------------------------------|
| AT-00168 *<br>(Figure 3A)   | GSE680/GSE1051: Transcript Profiling of Arabidopsis Plant Life Cycle / Seed development in LEAFY COTYLEDON1 mutants                            | Le BH et al. / Goldberg RB           |
| AT-00080 *<br>(Figure 3B)   | GSE607: Study of gene expression in expanding leaves, stem and flowers of Col-0 plants                                                         | E Osborne / C Somerville             |
| AT-00087 *                  | AtGenExpress: Development baseline I                                                                                                           | Weigel Lab                           |
| AT-00088 *<br>(Figure 3C,H) | AtGenExpress: Development baseline II                                                                                                          | Weigel Lab                           |
| AT-00327 *<br>(Figure 3D)   | E-MEXP-265: Transcription profiles from Arabidopsis stem, leaf and hypocotyl tissue                                                            | Zeef L et al. / Brown D              |
| AT-00093 *                  | AtGenExpress: root & shoot development                                                                                                         | Scheres Lab                          |
| AT-00122 *                  | Transcription profiling of Arabidopsis leaves, roots and whole plants grown in high or low phosphate conditions for different lengths of time. | J. Mission, MC Thibaud, S Somerville |
| AT-00191 *                  | GSE5749: A gene expression map of the Arabidopsis root                                                                                         | Birnbaum K et al./ Schildknecht B    |
| AT-00066 *<br>(Figure 3E)   | E-GEOD-5729: Transcription profiling of Arabidopsis continuous vascular (cov-1, cov-2) mutants                                                 | Turner S                             |
| AT-00249 *<br>(Figure 3F)   | GSE16468: Transcriptional and posttranscriptional regulation of transcription factor expression in Arabidopsis roots                           | Lee J et al. / Benfey P              |
| AT-00174 *<br>(Figure 3G)   | In vitro tracheary element transdifferentiation of Col-0 suspension cells                                                                      | Fukuda H et al. / Demura T           |
| AT-00154 *<br>(Figure 3I)   | Expression patterns of genes induced by sugar accumulation during early leaf senescence                                                        | Nathalie Pourtau / Astrid Winkler    |
