# Supplementary material for: Plant plasma membrane-bound staphylococcal-like DNases as a novel class of eukaryotic nucleases
Source: PubMed Central journal article supplement (PMC3505149; doi:10.1186/1471-2229-12-195), 2012-10-26
Supplement: 1471-2229-12-195-S2.pdf [file 1471-2229-12-195-S2.pdf]

**Additional file 2. Microarray experiments extracted from the Genevestigator website, examining expression of *Arabidopsis thaliana* genes in response to various pathogen infections and elicitor treatments.** Experiment ID marked with an asterisk (\*) refers to those experiments showing up regulation of the CAN1 gene in response to the respective treatment.

|          | Experiment ID             | Title                                                                                                                                                                                         | Authors                             |
|----------|---------------------------|-----------------------------------------------------------------------------------------------------------------------------------------------------------------------------------------------|-------------------------------------|
| bacteria | AT-00161 *<br>(Figure 4A) | GSE5525: Transcriptome changes of Arabidopsis during pathogen and insect attack                                                                                                               | Pieterse C et al. / Schildknecht B  |
|          | AT-00406 *<br>(Figure 4B) | GSE18978: Arabidopsis thaliana mutant leaves treated with Pseudomonas syringae ES4326                                                                                                         | Mitra R                             |
|          | AT-00340 *<br>(Figure 4C) | E-MEXP-1094: Expression profiles of Col-0 and transgenic lines overexpressing AtFAAH(At5g64440) after inoculated with nonhost pathogen Pseudomonas syringae pv. syringae at 0, 6 and 12 hours | Tang Y                              |
|          | AT-00106 *<br>(Figure 4E) | AtGenExpress: response to virulent, avirulent, typeIII-secretion system deficient and non-host bacterial pathogens                                                                            | Kemmerling B / Nürnberger T         |
|          | AT-00204 *                | GSE6556: Expression profiling of A. thaliana wild type Columbia-0 and mutant gh3.5-1D in response to pathogen Pst DC3000(avrRpt2)                                                             | Zhang Z et al. / He Z               |
|          | AT-00211 *                | E-MEXP-546: Transcription profiling leading to the identification of novel components in the EDS1/PAD4-regulated defence pathway Arabidopsis-Pst-eds1-pad4                                    | Bartsch M / Gobbato E / Parker J    |
|          | AT-00202 *                | GSE5520: Genome-wide transcriptional analysis of the compatible A. thaliana-P. syringae pv. tomato DC3000 interaction                                                                         | Underwood W et al. / Schildknecht B |
|          | AT-00391                  | GSE17464: Arabidopsis mutants treated with flg22, Alternaria brassicicola, Methyl jasmonate and Pst DC3000 bacteria                                                                           | Bari R et al. / Jones J             |
|          | AT-00393 *                | GSE19255: Microarray analysis of fdh1-3(avrB)                                                                                                                                                 | Yun B                               |
|          | AT-00148 *                | AtGenExpress: Pseudomonas half leaf injection                                                                                                                                                 | Xinnian Dong                        |
| viruses  | AT-00318 *<br>(Figure 4D) | E-ATMX-34: Effect of geminivirus Cabbage leaf curl virus on Arabidopsis Col-0 at 12 days post-inoculation during short day conditions                                                         | Ascencio-Ibanez T                   |
|          | AT-00324                  | E-MEXP-509: Potyvirus turnip mosaic virus infection                                                                                                                                           | Yang C                              |
| fungi    | AT-00161.<br>(Figure 4A)  | GSE5525: Transcriptome changes of Arabidopsis during pathogen and insect attack                                                                                                               | Pieterse C et al. / Schildknecht B  |
|          | AT-00023                  | GSE10323: Testing Arabidopsis for the presence of arbuscular mycorrhizal signalling pathways                                                                                                  | Yap H et al. / Schildknecht B       |
|          | AT-00085                  | GSE431: pmr4 vs. wild-type                                                                                                                                                                    | Nishimura MT et al. / Somerville S  |
|          | AT-00146                  | GSE5686: AtGenExpress: Pathogen Series: Response to Erysiphe orontii infection                                                                                                                | Ausubel F et AL / Schildknecht B    |
|          | AT-00147                  | GSE5684: AtGenExpress: Pathogen Series: Response to Botrytis cinerea infection                                                                                                                | Denoux C et al. / Schildknecht B    |
|          | AT-00309                  | GSE12856: Penetration resistance: Wildtype and ataf1-1 mutant response to Bgh 12 h after inoculation, 2*2 factorial design                                                                    | Jensen MK                           |
|          | AT-00391                  | GSE17464: Arabidopsis mutants treated with flg22, Alternaria brassicicola, Methyl jasmonate and Pst DC3000 bacteria                                                                           | Bari R et al. / Jones J             |
|          | AT-00453                  | GSE26679: comparison of powdery mildew-induced gene expression between Col-0 and the edr1 mutant                                                                                              | Innes RW / MChristiansen K          |
| oomycete | AT-00108                  | GSE5616: AtGenExpress: Response to Phytophthora infestans                                                                                                                                     | Scheel D et al. / Schildknecht B    |
|          | AT-00425                  | GSE20226: Arabidopsis thaliana/Phytophthora parasitica compatible interaction transcriptome                                                                                                   | Attard A                            |

**Additional file 2.** continued

|              |                           |                                                                                                                                                                       |                                                |
|--------------|---------------------------|-----------------------------------------------------------------------------------------------------------------------------------------------------------------------|------------------------------------------------|
| insects      | AT-00203                  | Silverleaf whitefly 2nd instar feeding on 7-week old <i>Arabidopsis thaliana</i> rosette leaves                                                                       | Kempema LA, Cui X, Holzer FM, Walling LL       |
|              | AT-00250                  | GSE16497: <i>Arabidopsis thaliana</i> gene expression changes upon treatment with green peach aphid saliva                                                            | Jander G et al. / de Vos M                     |
| nematodes    | AT-00024                  | Plant gene expression associated with susceptibility to nematodes                                                                                                     | Peter Edward Urwin                             |
|              | AT-00121                  | Microarray analysis of <i>Arabidopsis</i> roots that have been infested with the root knot nematode <i>Meloidogyne incognita</i>                                      | CG Taylor, E Nielsen, DP Schachtman, U. Hammes |
| Flg22        | AT-00107 *<br>(Figure 4F) | GSE5615: AtGenExpress: Response to bacterial-(LPS, HrpZ, Flg22) and oomycete-(NPP1) derived elicitors                                                                 | Brunner F et al. / Schildknecht B              |
|              | AT-00253 *                | E-NASC-76: Expression profiling of seedlings treated with oligogalacturonides (OGs) and Flg22                                                                         | Dewdney J / Schildknecht B                     |
|              | AT-00391 *                | GSE17464: <i>Arabidopsis</i> mutants treated with flg22, <i>Alternaria brassicicola</i> , Methyl jasmonate and Pst DC3000 bacteria                                    | Bari R et al. / Jones J                        |
|              | AT-00392                  | GSE17479: Effect of auxin signaling on flg22 response                                                                                                                 | Robert-Seilaniantz A et al. / Jones JD         |
| syringolin A | AT-00325 *<br>(Figure 4G) | E-MEXP-739: Transcriptional changes in powdery mildew infected <i>Arabidopsis</i> leaves undergoing syringolin-triggered hypersensitive cell death at infection sites | Michel K                                       |
|              | AT-00258 *                | Transcriptome changes in <i>Arabidopsis</i> mutant syl_404_bc2 after syringolin application                                                                           | Michel K / Dudler R                            |
|              | AT-00325 *                | E-MEXP-739: Transcriptional changes in powdery mildew infected <i>Arabidopsis</i> leaves undergoing syringolin-triggered hypersensitive cell death at infection sites | Michel K                                       |
