# Supplementary material for: Plant plasma membrane-bound staphylococcal-like DNases as a novel class of eukaryotic nucleases
Source: PubMed Central journal article supplement (PMC3505149; doi:10.1186/1471-2229-12-195), 2012-10-26
Supplement: 1471-2229-12-195-S3.pdf [file 1471-2229-12-195-S3.pdf]

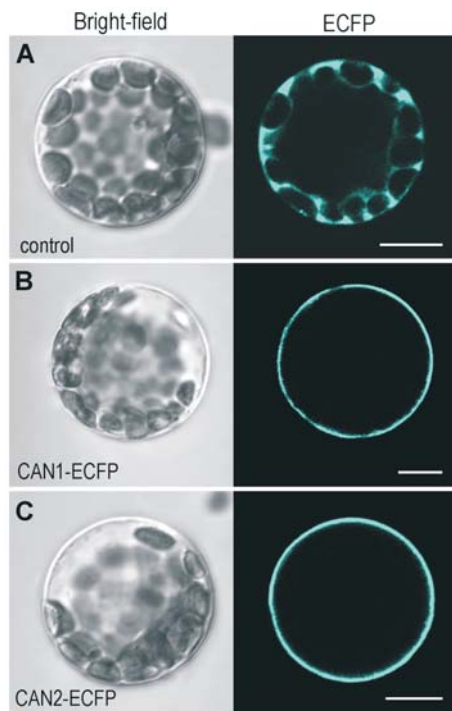

**Additional file 3. Plasma membrane localization of CAN1 and CAN2 nucleases in leaf protoplasts.** ECFP alone and ECFP-fusion proteins were transiently expressed in protoplasts from isolated leaf mesophyll cells. The bright-field images are shown in the left part of each panel and corresponding confocal laser scanning images are on the right. (A) Protoplast transformed with an empty vector (pSAT6A-ECFP) as a control. (B) Expression of the CAN1-ECFP fusion construct. (C) Expression of the CAN2-ECFP fusion construct. The scale bar indicates 10  $\mu\text{m}$ .
