# Supplementary material for: Plant plasma membrane-bound staphylococcal-like DNases as a novel class of eukaryotic nucleases
Source: PubMed Central journal article supplement (PMC3505149; doi:10.1186/1471-2229-12-195), 2012-10-26
Supplement: 1471-2229-12-195-S4.pdf [file 1471-2229-12-195-S4.pdf]

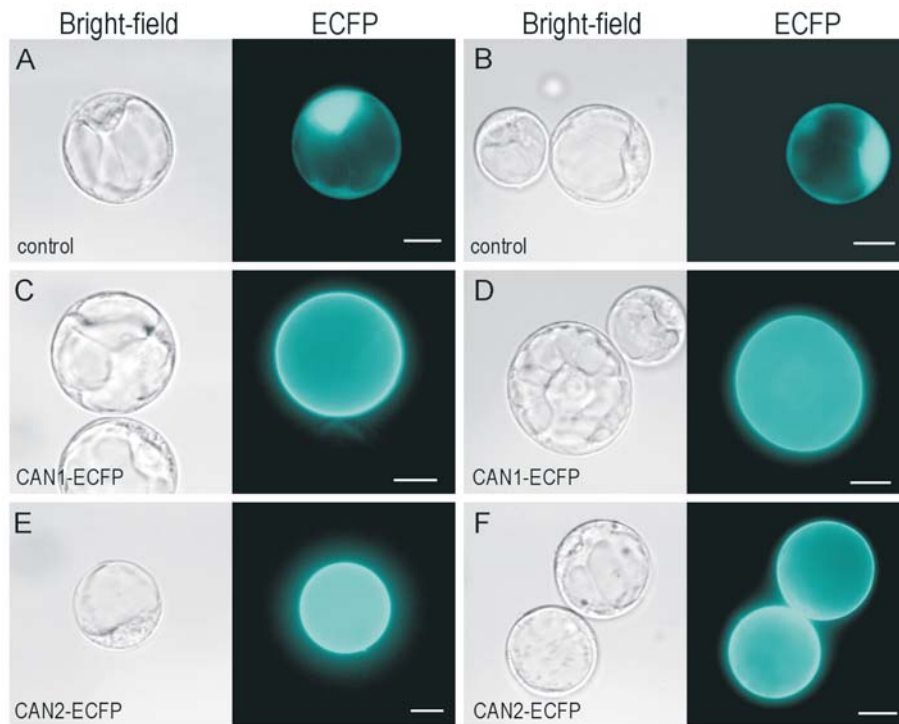

**Additional file 4. The plasma membrane localization of CAN nucleases by fluorescence microscopy.** ECFP alone and ECFP-fusion proteins were transiently expressed in *Arabidopsis* root cell protoplasts. The bright-field images are shown in the left part of each panel and corresponding ECFP fluorescence images are shown on the right. Two examples from each experiment are shown. **(A-B)** Protoplasts transformed with an empty vector (pSAT6A-ECFP) as a control. **(C-D)** Expression of the CAN1-ECFP fusion constructs. **(E-F)** Expression of the CAN2-ECFP fusion constructs. The scale bar indicates 10  $\mu\text{m}$ .
